# Supplementary material for: Acquisition of intact polar lipids from the prymnesiophyte Phaeocystis globosa by its lytic virus PgV-07T
Source: Copernicus journal article supplement (doi:10.5194/bg-11-185-2014), 2014-01-14
Supplement: Supplementary file [file bg-11-185-2014-supplement.pdf]

Table S1. Fatty acid combinations of the different intact polar lipid groups detected in *P. globosa*. The separate fatty acid combinations are given in brackets where fragmentation allowed identification. n.d. = non-detected.

|              |                                                   |                                          |                                                   |                                         |
|--------------|---------------------------------------------------|------------------------------------------|---------------------------------------------------|-----------------------------------------|
| <b>MGDGs</b> | C <sub>28:0</sub> (14:0,14:0)                     | C <sub>30:0</sub> (14:0,16:0)            | C <sub>30:1</sub>                                 | C <sub>30:2</sub>                       |
|              | C <sub>32:1</sub> (14:0,18:1)                     | C <sub>32:2</sub> (14:0,18:2)            | C <sub>32:3</sub> (14:0,18:3)                     | C <sub>32:4</sub> (14:0,18:4)           |
|              | C <sub>32:5</sub> (14:0,18:5)                     | C <sub>34:1</sub> (16:0,18:1)            | C <sub>34:2</sub> (16:0,18:2)                     | C <sub>34:3</sub>                       |
|              | C <sub>34:4</sub> (16:0,18:4)                     | C <sub>34:5</sub> (16:1,18:4)            | C <sub>34:6</sub>                                 | C <sub>34:7</sub> (16:2,18:5)           |
|              | C <sub>34:8</sub>                                 | C <sub>34:9</sub>                        | C <sub>36:2</sub> (18:1,18:1)                     | C <sub>36:3</sub>                       |
|              | C <sub>36:4</sub>                                 | C <sub>36:5</sub> (18:1,18:4;18:2,18:3)  | C <sub>36:6</sub> (18:2,18:4;18:3,18:3;18:1,18:5) | C <sub>36:7</sub> (18:2,18:5;18:3,18:4) |
|              | C <sub>36:8</sub> (18:4,18:4;18:3,18:5;18:1,18:6) | C <sub>36:9</sub> (18:4,18:5;18:3,18:6)  | C <sub>36:10</sub> (18:5,18:5)                    |                                         |
| <b>DGDGs</b> | C <sub>32:1</sub>                                 | C <sub>32:2</sub> (14:0,18:2)            | C <sub>32:3</sub> (14:0,18:3)                     | C <sub>32:4</sub> (14:0,18:4)           |
|              | C <sub>32:5</sub> (14:0,18:5)                     | C <sub>34:2</sub> (16:0,18:2)            | C <sub>34:3</sub> (16:0,18:3)                     | C <sub>34:4</sub> (16:0,18:4)           |
|              | C <sub>34:5</sub> (16:0,18:5)                     | C <sub>34:7</sub> (16:2,18:5)            | C <sub>36:2</sub> (18:1,18:1)                     | C <sub>36:3</sub>                       |
|              | C <sub>36:4</sub>                                 | C <sub>36:10</sub> (18:5,18:5)           |                                                   |                                         |
| <b>SQDGs</b> | C <sub>32:1</sub> (14:0,18:1)                     | C <sub>36:7</sub> (18:3,18:4; 18:5,18:2) |                                                   |                                         |
| <b>PEs</b>   | C <sub>36:6</sub> (22:6,14:0)                     | C <sub>44:12</sub> (22:6,22:6)           |                                                   |                                         |
| <b>DMPEs</b> | C <sub>36:6</sub> (22:6,14:0)                     | C <sub>38:6</sub> (22:6,16:0)            | C <sub>44:12</sub> (22:6,22:6)                    |                                         |
| <b>PGs</b>   | C <sub>36:7</sub> (20:5, 16:2)                    | C <sub>38:6</sub> (22:6,16:0)            | C <sub>40:6</sub> (22:6,18:0)                     |                                         |
| <b>PCs</b>   | C <sub>32:4</sub> (18:4,14:0)                     | C <sub>34:4</sub>                        | C <sub>34:5</sub>                                 | C <sub>36:4</sub>                       |
|              | C <sub>36:5</sub>                                 | C <sub>36:6</sub> (18:4,14:0)            | C <sub>36:7</sub>                                 | C <sub>38:6</sub>                       |
|              | C <sub>38:7</sub>                                 | C <sub>38:8</sub>                        | C <sub>38:9</sub>                                 | C <sub>40:6</sub>                       |
|              | C <sub>40:7</sub>                                 | C <sub>40:8</sub>                        | C <sub>40:9</sub>                                 | C <sub>40:10</sub>                      |
|              | C <sub>40:11</sub>                                | C <sub>42:11</sub>                       | C <sub>44:12</sub> (22:6,22:6)                    |                                         |
| <b>DGTAs</b> | C <sub>34:1</sub> (16:0,18:1)                     | C <sub>34:2</sub>                        | C <sub>34:3</sub> (16:1,18:2)                     | C <sub>34:4</sub> (16:0,18:4)           |
|              | C <sub>36:2</sub> (18:1,18:1)                     | C <sub>36:3</sub>                        | C <sub>36:4</sub>                                 | C <sub>36:5</sub> (16:0,20:5)           |
| <b>DGCCs</b> | C <sub>32:5</sub> (18:5,14:0)                     | C <sub>34:5</sub> (16:0,18:5)            | C <sub>36:6</sub> (18:1,18:5)                     | C <sub>38:6</sub> (16:0,22:6)           |
|              | C <sub>38:10</sub> (20:5,18:5)                    | C <sub>40:11</sub> (22:6,18:5)           | C <sub>44:12</sub> (22:6,22:6)                    |                                         |

Table S2. Fatty acid combinations of the different intact polar lipid groups detected in PgV-07T. The separate fatty acid combinations are given in brackets where fragmentation allowed identification. n.d. = non-detected.

|              |                                 |                               |                    |                               |
|--------------|---------------------------------|-------------------------------|--------------------|-------------------------------|
| <b>MGDGs</b> | C <sub>28:0</sub> (14:0,14:0)   | C <sub>30:0</sub> (14:0,16:0) | C <sub>30:1</sub>  | C <sub>30:2</sub>             |
|              | C <sub>32:1</sub> (14:0,18:1)   | C <sub>32:2</sub>             | C <sub>32:3</sub>  | C <sub>32:4</sub>             |
|              | C <sub>34:1</sub> (16:0,18:1)   | C <sub>34:2</sub>             | C <sub>34:3</sub>  |                               |
| <b>DGDGs</b> | C <sub>32:1</sub> (14:0,18:1)   |                               |                    |                               |
| <b>SQDGs</b> | n.d.                            |                               |                    |                               |
| <b>PEs</b>   | n.d.                            |                               |                    |                               |
| <b>DMPEs</b> | C <sub>44:12</sub> (22:6, 22:6) |                               |                    |                               |
| <b>PGs</b>   | C <sub>38:6</sub> (22:6,16:0)   | C <sub>40:6</sub> (22:6,18:0) |                    |                               |
| <b>PCs</b>   | C <sub>32:4</sub>               | C <sub>34:4</sub>             | C <sub>34:5</sub>  | C <sub>34:7</sub>             |
|              | C <sub>36:4</sub>               | C <sub>36:5</sub>             | C <sub>36:6</sub>  | C <sub>36:7</sub>             |
|              | C <sub>36:8</sub>               | C <sub>36:9</sub>             | C <sub>36:10</sub> | C <sub>38:5</sub>             |
|              | C <sub>38:6</sub>               | C <sub>38:7</sub>             | C <sub>38:8</sub>  | C <sub>38:9</sub>             |
|              | C <sub>38:10</sub>              | C <sub>40:6</sub>             | C <sub>40:7</sub>  | C <sub>40:8</sub>             |
|              | C <sub>40:9</sub>               | C <sub>40:10</sub>            | C <sub>40:11</sub> | C <sub>42:11</sub>            |
|              | C <sub>42:12</sub>              | C <sub>42:13</sub>            | C <sub>44:12</sub> |                               |
| <b>DGTAs</b> | C <sub>34:1</sub> (16:0,18:1)   | C <sub>34:2</sub>             | C <sub>34:3</sub>  | C <sub>34:4</sub> (16:0,18:4) |
|              | C <sub>36:4</sub>               | C <sub>36:5</sub>             |                    |                               |
| <b>DGCCs</b> | C <sub>32:5</sub>               | C <sub>34:5</sub> (16:0,18:5) | C <sub>36:6</sub>  | C <sub>38:6</sub>             |
|              | C <sub>38:10</sub> (20:5,18:5)  | C <sub>40:11</sub>            | C <sub>44:12</sub> |                               |
